# Supplementary material for: Genetic, Clinical, and Biological Risk Factors Associated with Optic Nerve Thinning in Sickle Cell Disease.
Source: Research Square preprint supplement (doi:10.21203/rs.3.rs-7667965/v1), 2025-11-06
Supplement: Supplementary file 1 [file 405d82ca7495ed81acc321ac.docx]

|  | Odd ratio | 95% Confidence Interval | p-value |
| --- | --- | --- | --- |
| Age (years) | 1.07 | [1.03-1.10] | 0.0004 |
| Osteonecrosis | 1.85 | [0.67-5.11] | 0.24 |
| ACS within 2 years | 3.92 | [1.03-14.9] | 0.04 |
| ACS history | 0.37 | [0.08-1.79] | 0.22 |
| VOC frequency within 2 years |  |  | < 0.0001 |
| 0 | ref | ref |  |
| 1 | 32.0 | [6.51-157] | 0.0003 |
| 2 or + | 17.2 | [5.24-56.7] | 0.0002 |
| Hemoglobin (g/dL) | 0.74 | [0.60-0.90] | 0.003 |

**Supplemental Table 3.** Multivariable analysis of risk factors associated with optic neuropathy.

Odds ratios and 95% confidence intervals were estimated using a generalized estimating equations logistic regression model clustered by patient (exchangeable correlation structure) to account for inter-eye correlation. VOC frequency is reported with 0 as reference.

***Abbreviations*:** ACS: acute chest syndrome; VOC: vaso-occlusive crisis.
