# Supplementary material for: Genetic, Clinical, and Biological Risk Factors Associated with Optic Nerve Thinning in Sickle Cell Disease.
Source: Research Square preprint supplement (doi:10.21203/rs.3.rs-7667965/v1), 2025-11-06
Supplement: Supplementary file 2 [file 9646dc7bfd2546ecfbae606e.docx]

|  |  | **HbSS (n = 116)***  Mean ± SD  Median [IQR] | **HbSC (n = 69)**  Mean ± SD  Median [IQR] | **Controls (n = 40)**  Mean ± SD  Median [IQR] | **HbSS vs HbSC** | | **HbSS vs Controls** | | **HbSC vs Controls** | |
| --- | --- | --- | --- | --- | --- | --- | --- | --- | --- | --- |
|  |  | p  (raw) | p  (Holm) | p  (raw) | p  (Holm) | p  (raw) | p  (Holm) |
| **BMO-MRW** | **Average** | 301.0 ± 93.1 | 276.9 ± 47.5 | 390.0 ± 59.0 | 0.07 | 0.07 | **<0.0001** | **<0.0001** | **<0.0001** | **<0.0001** |
| 278.7 [251.8–342.4] | 276.5 [250.3–297.5] | 370.8 [352.7–417.9] |
| **N** | 313.4 ± 106.8 | 294.2 ± 62.8 | 388.3 ± 73.3 | 0.24 | 0.24 | **<0.0001** | **<0.0001** | **<0.0001** | **<0.0001** |
| 290.0 [252.2–350.0] | 289.0 [264.0–310.0] | 379.0 [325.8–438.2] |
| **NI** | 323.4 ± 109.5 | 302.8 ± 71.0 | 432.1 ± 78.7 | 0.24 | 0.24 | **<0.0001** | **<0.0001** | **<0.0001** | **<0.0001** |
| 300.0 [251.0–355.2] | 290.0 [276.0–317.0] | 435.5 [355.8–489.2] |
| **NS** | 315.4 ± 106.6 | 287.6 ± 58.0 | 412.1 ± 78.7 | **0.05** | **0.05** | **<0.0001** | **<0.0001** | **<0.0001** | **<0.0001** |
| 300.0 [255.2–336.8] | 290.0 [252.0–309.0] | 401.5 [360.2–453.2] |
| **T** | 262.2 ± 94.3 | 230.0 ± 58.6 | 346.5 ± 107.3 | **0.02** | **0.02** | **0.0004** | **0.001** | **<0.0001** | **<0.0001** |
| 242.5 [200.0–306.5] | 218.0 [200.0–252.0] | 341.0 [256.8–416.8] |
| **TI** | 305.3 ± 100.1 | 283.6 ± 63.1 | 392.4 ± 73.6 | 0.13 | 0.13 | **<0.0001** | **<0.0001** | **<0.0001** | **<0.0001** |
| 284.5 [244.5–367.8] | 290.0 [226.0–321.0] | 379.0 [350.0–434.0] |
| **TS** | 286.1 ± 99.8 | 263.1 ± 63.4 | 368.8 ± 78.0 | 0.12 | 0.12 | **<0.0001** | **<0.0001** | **<0.0001** | **<0.0001** |
| 268.0 [227.8–350.0] | 270.0 [223.0–289.0] | 358.5 [313.5–408.2] |
| **RNFL** | **Average** | 116.9 ± 31.8 | 106.0 ± 20.0 | 125.8 ± 14.5 | **0.047** | **0.047** | **0.02** | **0.02** | **<0.0001** | **<0.0001** |
| 108.3 [96.5–136.0] | 100.2 [92.7–108.7] | 120.9 [115.6–134.0] |
| **N** | 95.6 ± 32.8 | 89.7 ± 24.8 | 106.4 ± 48.2 | 0.24 | 0.37 | 0.18 | 0.37 | **0.04** | **0.12** |
| 89.5 [79.0–107.5] | 88.0 [73.0–101.0] | 100.0 [89.8–109.0] |
| **NI** | 128.5 ± 41.1 | 114.6 ± 29.5 | 128.8 ± 27.2 | 0.99 | 0.99 | 0.99 | 0.99 | 0.06 | 0.15 |
| 111.5 [100.0–147.5] | 109.0 [98.0–128.0] | 125.0 [107.5–145.2] |
| **NS** | 128.3 ± 42.0 | 121.0 ± 35.9 | 135.4 ± 36.6 | 0.41 | 0.51 | 0.41 | 0.51 | 0.09 | 0.26 |
| 117.0 [101.0–152.2] | 109.0 [100.0–135.0] | 132.5 [120.8–150.0] |
| **T** | 84.1 ± 26.5 | 76.8 ± 15.1 | 89.5 ± 23.1 | 0.26 | 0.26 | 0.26 | 0.26 | **0.003** | **0.01** |
| 81.0 [69.0–90.0] | 78.0 [67.0–86.0] | 90.0 [72.8–101.8] |
| **TI** | 140.9 ± 46.0 | 123.0 ± 31.4 | 155.6 ± 23.1 | **0.032** | **0.032** | **0.02** | **0.02** | **<0.0001** | **<0.0001** |
| 130.0 [108.0–167.2] | 111.0 [101.0–138.0] | 150.0 [143.8–168.5] |
| **TS** | 124.0 ± 36.7 | 110.7 ± 24.6 | 138.8 ± 23.7 | **0.015** | **0.020** | **0.003** | **0.01** | **<0.0001** | **<0.0001** |
| 120.0 [100.0–138.5] | 104.0 [98.0–120.0] | 137.5 [122.5–149.5] |
| **GCC** | **Average** | 48.5 ± 6.1 | 48.8 ± 6.4 | 53.8 ± 3.3 | 0.84 | 0.84 | **<0.0001** | **<0.0001** | **<0.0001** | **<0.0001** |
| 49.0 [45.5–51.5] | 49.8 [45.5–53.2] | 54.1 [51.2–56.2] |
| **I** | 51.0 ± 6.8 | 51.3 ± 5.6 | 54.2 ± 4.2 | 0.80 | 0.80 | **0.001** | **0.002** | **0.001** | **0.003** |
| 52.0 [48.0–55.0] | 51.0 [47.0–55.0] | 54.0 [52.0–56.2] |
| **N** | 49.8 ± 7.3 | 50.1 ± 7.3 | 53.1 ± 4.1 | 0.78 | 0.78 | **0.001** | **0.003** | **0.003** | **0.01** |
| 51.0 [46.0–55.0] | 51.0 [45.0–55.0] | 53.5 [50.0–56.2] |
| **S** | 50.1 ± 7.5 | 49.9 ± 8.8 | 53.2 ± 5.6 | 0.69 | 0.69 | **0.01** | **0.03** | **0.02** | **0.03** |
| 51.5 [48.0–54.0] | 51.0 [48.0–54.0] | 53.5 [50.8–56.0] |
| **T** | 42.9 ± 8.6 | 43.9 ± 9.1 | 54.6 ± 4.8 | 0.70 | 0.70 | **<0.0001** | **<0.0001** | **<0.0001** | **<0.0001** |
| 44.0 [37.8–48.2] | 45.0 [40.0–48.0] | 54.0 [51.0–58.2] |

**Supplemental Table 1.** Comparison of optic nerve and macular thickness parameters (RNFL, BMO-MRW, and GCC) between SCD patients and controls.

Values are reported as median [IQR]. p-values were obtained from generalized estimating equation (GEE) linear models (identity link) clustered by patient to account for inter-eye correlation (exchangeable working correlation) and test the difference between SCD and controls.

***Abbreviations*:** SCD: sickle cell disease; BMO-MRW: Bruch’s membrane opening–minimum rim width; GCC: ganglion cell complex; RNFL: retinal nerve fiber layer.

**Sectors:** RNFL: TS (superotemporal), T (temporal), TI (inferotemporal), NI (inferonasal), N (nasal), NS (superonasal); GCC: T (temporal), I (inferior), N (nasal), S (superior).

BMO-MRW measurements available for n: 114 eyes.
