# Supplementary material for: Genetic, Clinical, and Biological Risk Factors Associated with Optic Nerve Thinning in Sickle Cell Disease.
Source: Research Square preprint supplement (doi:10.21203/rs.3.rs-7667965/v1), 2025-11-06
Supplement: Supplementary file 3 [file 9e59d36072e141aca967dbb3.docx]

|  | HbSS | | | | | | HbSC | | | | | | |
| --- | --- | --- | --- | --- | --- | --- | --- | --- | --- | --- | --- | --- | --- |
|  | **BMO-MRW** | | **RNFL** | | **GCC** | | **BMO-MRW** | | **RNFL** | | GCC | | |
|  | **ρ** | **p-value** | **ρ** | **p-value** | **ρ** | **p-value** | **ρ** | **p-value** | **ρ** | **p-value** | **ρ** | p-value |
| Hemoglobin (g/dL) | **0.41** | **0.001** | **0.24** | **0.032** | 0.12 | 0.31 | 0.18 | 0.2 | -0.14 | 0.36 | 0.16 | 0.29 |
| Hematocrit (%) | 0.01 | 0.96 | -0.03 | 0.8 | 0.07 | 0.58 | -0.12 | 0.38 | -0.29 | 0.06 | 0.04 | 0.79 |
| Platelets (G/L) | -0.08 | 0.51 | -0.09 | 0.42 | -0.07 | 0.55 | 0.13 | 0.34 | 0.11 | 0.49 | -0.09 | 0.55 |
| Reticulocytes (G/L) | -0.05 | 0.69 | 0.01 | 0.93 | **-0.25** | **0.038** | -0.08 | 0.58 | 0.04 | 0.81 | **-0.31** | 0.038 |
| Leucocytes (G/L) | 0.05 | 0.72 | 0.05 | 0.67 | 0.13 | 0.29 | -0.06 | 0.66 | -0.17 | 0.26 | -0.07 | 0.62 |
| Neutrophils (G/L) | -0.1 | 0.42 | 0.01 | 0.96 | 0.2 | 0.11 | 0.03 | 0.86 | 0.01 | 0.98 | -0.03 | 0.84 |
| CRP (mg/L) | -0.14 | 0.32 | -0.11 | 0.39 | 0.09 | 0.49 | -0.02 | 0.88 | -0.08 | 0.6 | -0.07 | 0.68 |
| PT (%) | -0.03 | 0.83 | 0.04 | 0.72 | 0.15 | 0.23 | 0.02 | 0.91 | -0.05 | 0.73 | 0.07 | 0.66 |
| LDH (UI/L) | -0.13 | 0.3 | -0.04 | 0.72 | -0.14 | 0.24 | 0.06 | 0.67 | 0.06 | 0.73 | -0.06 | 0.71 |
| Total bilirubin (µmol/L) | -0.14 | 0.27 | 0.02 | 0.88 | -0.12 | 0.33 | 0.09 | 0.56 | 0.14 | 0.38 | -0.07 | 0.68 |
| GGT (U/L) | 0.16 | 0.22 | -0.08 | 0.5 | -0.03 | 0.84 | 0.06 | 0.7 | -0.04 | 0.79 | -0.02 | 0.91 |
| Serum ferritin (ng/ml) | 0.02 | 0.91 | 0.11 | 0.58 | -0.18 | 0.33 | **0.41** | **0.049** | 0.23 | 0.27 | 0.13 | 0.54 |
| Fibrinogen (g/L) | -0.11 | 0.39 | -0.13 | 0.26 | 0.05 | 0.7 | -0.01 | 0.96 | -0.02 | 0.92 | -0.39 | 0.029 |

**Supplemental Table 2.** Correlations between OCT parameters (BMO-MRW, RNFL, GCC) and biological variables per genotype.

Both variables were standardized (z-scores), and **linear mixed-effects models** with a random intercept for patient were used to account for **inter-eye correlation** without averaging. ρ denotes the standardized association (correlation-like effect size).

***Abbreviations:*** BMO-MRW: Bruch’s membrane opening–minimum rim width; RNFL: retinal nerve fiber layer; GCC: ganglion cell complex; ACS: acute chest syndrome; CVA: cerebrovascular accident; VOC: vaso-occlusive crisis; PT: prothrombin time; CRP: C-reactive protein; LDH: lactate dehydrogenase; GGT: gamma-glutamyl transferase.
